# Supplementary material
Source: PubMed Central journal article supplement (PMC2990207)
Supplement: supp_137.24.4159_DEV056630SuppTableS1.pdf [file supp_137.24.4159_DEV056630SuppTableS1.pdf]

**Table S1. Preimplantation development of siCdx2-injected embryos**

| Group        | Number of 2-cell embryos/total injected (%) | Blastocyst formation (%) | Hatched blastocysts (%) |
|--------------|---------------------------------------------|--------------------------|-------------------------|
| Not injected | 34/34 (100)                                 | 29/34 (85.3)             | 17/26 (65.4)            |
| siControl    | 259/261 (99.2)                              | 227/261 (87.0)           | 43/71 (60.6)            |
| siCdx2       | 248/250 (99.2)                              | 221/250 (88.4)           | 0/86 (0)                |

To assess the developmental characteristics of embryos depleted of Cdx2 by siRNA treatment, the injected oocytes were cultured in KSOM medium and evaluated twice daily. The rates of cleavage, blastocyst formation and hatching were recorded at 1.5, 3.5 and 6 dpc, respectively. The numbers for hatching observation were reduced because samples were randomly taken out for other experiments. No significant differences were found until the blastocysts began hatching. All siCdx2-treated blastocysts failed to hatch and ultimately collapsed. The data are pooled from three independent microinjection experiments.
