# Supplementary material
Source: PubMed Central journal article supplement (PMC2990207)
Supplement: supp_137.24.4159_DEV056630SuppTableS2.pdf [file supp_137.24.4159_DEV056630SuppTableS2.pdf]

**Table S2. Preimplantation development of siCdx2 and antibody co-injected embryos**

| Group        | Number of 2-cell embryos/total injected (%) | Blastocyst formation (%) | Hatched blastocysts (%) |
|--------------|---------------------------------------------|--------------------------|-------------------------|
| ScrCtr + BSA | 32/33 (75.8)                                | 25/33 (75.8)             | 12/25 (36.3)            |
| ScrCtr + Ab  | 49/49 (100)                                 | 45/49 (91.8)             | 19/45 (38.8)            |
| siCdx2 + BSA | 34/34 (100)                                 | 27/34 (79.4)             | 0/27 (0)                |
| siCdx2 + Ab  | 47/49 (95.9)                                | 44/49 (89.8)             | 0/44 (0)                |

To evaluate the roles of possible residual maternal Cdx2 proteins in blastocyst formation, siCdx2 was co-injected into zygotes with a rabbit polyclonal Cdx2 antibody (Ab) or with BSA as control. The rates of cleavage, blastocyst formation and hatching were recorded at 1.5, 3.5 and 6 dpc, respectively. Blastocyst formation was not affected by co-injection of Ab and siCdx2. The data are pooled from two independent microinjection experiments.
